# Supplementary material for: Radiochromic semiconductive MOFs with high sensitivity and fast photochromic responses for dual-mode X-ray direct detection
Source: Royal Society of Chemistry journal article supplement (doi:10.1039/d4qi00771a), 2024-01-01
Supplement: d4qi00771a1.pdf [file d4qi00771a1.pdf]

## **Radiochromic Semiconductive MOF with High Sensitivity and Fast Photochromic Response for Dual-mode X-ray Direct Detection**

Xu-Ying Yu,<sup>a,b</sup> Jia-Rong Mi,<sup>a</sup> Qiu-Pei Qin,<sup>a,c</sup> Xin-Ping Fang,<sup>a,c</sup> Yong-Fang Han,<sup>d</sup> Li-Zhen Cai,<sup>a</sup>

Ming-Sheng Wang\*<sup>a</sup> and Guo-Cong Guo\*<sup>a</sup>

<sup>a</sup> State Key Laboratory of Structural Chemistry, Fujian Institute of Research on the Structure of Matter, Chinese Academy of Sciences, Fuzhou, Fujian 3500608, P. R. China.

<sup>b</sup> University of Chinese Academy of Sciences, Beijing 100049, P. R. China.

<sup>c</sup> College of Chemistry and Materials Science, Fujian Normal University, Fuzhou, Fujian 350007, P. R. China.

<sup>d</sup> College of Chemistry and Chemical Engineering, Liaocheng University, Liaocheng, Shandong 252000, P. R. China.

\*Corresponding authors. E-mail addresses: mswang@fjirsm.ac.cn (M.-S. Wang), gcguo@fjirsm.ac.cn (G.-C. Guo)

Experimental section:

**Table S1.** Crystal and structure refinement data for **RCS-2** (as-synthesized).

| RCS-2                                                         |                                                                                                 |
|---------------------------------------------------------------|-------------------------------------------------------------------------------------------------|
| Formula                                                       | C <sub>39</sub> H <sub>21</sub> Dy <sub>2</sub> NNa <sub>2</sub> O <sub>30</sub> S <sub>4</sub> |
| $M_r$                                                         | 1482.79                                                                                         |
| Crystal system                                                | monoclinic                                                                                      |
| Space group                                                   | <i>C2/c</i>                                                                                     |
| $a$ (Å)                                                       | 22.2834(2)                                                                                      |
| $b$ (Å)                                                       | 30.0518(3)                                                                                      |
| $c$ (Å)                                                       | 22.9729(3)                                                                                      |
| $\alpha$ (deg)                                                | 90                                                                                              |
| $\beta$ (deg)                                                 | 93.3340(10)                                                                                     |
| $\gamma$ (deg)                                                | 90                                                                                              |
| $V$ (Å <sup>3</sup> )                                         | 15357.9(2)                                                                                      |
| $D_{calcd}$ (g/cm <sup>3</sup> )                              | 1.283                                                                                           |
| $Z$                                                           | 8                                                                                               |
| $F(000)$                                                      | 5760.0                                                                                          |
| Abs coeff                                                     | 12.000                                                                                          |
| $R_{int}$                                                     | 0.0345                                                                                          |
| $R_1^a$                                                       | 0.0696                                                                                          |
| $\omega R_2^b$                                                | 0.1918                                                                                          |
| GOF on $F^2$                                                  | 1.058                                                                                           |
| $\Delta\rho_{max}$ and $\Delta\rho_{min}$ (e/Å <sup>3</sup> ) | 1.695 and -2.030                                                                                |

$$^aR_1 = \Sigma||F_o|-|F_c||/\Sigma|F_o|, \quad ^b\omega R_2 = \{\Sigma\omega[(F_o)^2-(F_c)^2]/\Sigma\omega[(F_o)_2]^2\}^{1/2}$$

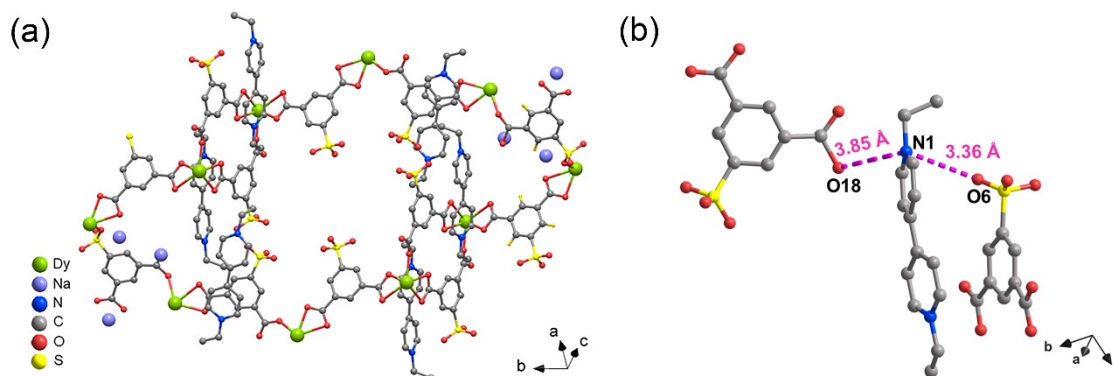

**Fig. S1** Crystal structures for **RCS-2**: (a) One-dimensional pore structure formed by ligands and metals. (b) The distance of N and O atoms.

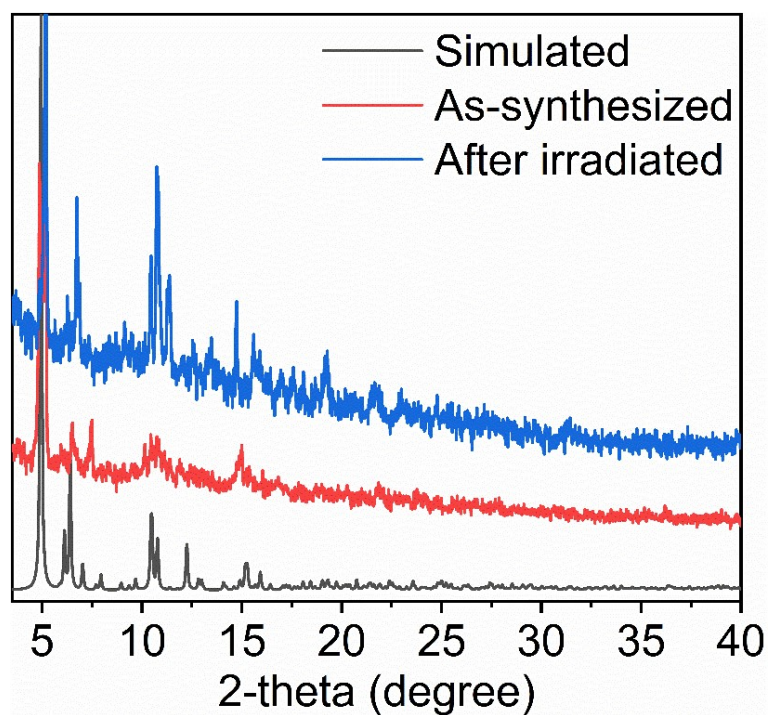

**Fig. S2** PXRD for the as-synthesized sample and irradiated sample of **RCS-2**.

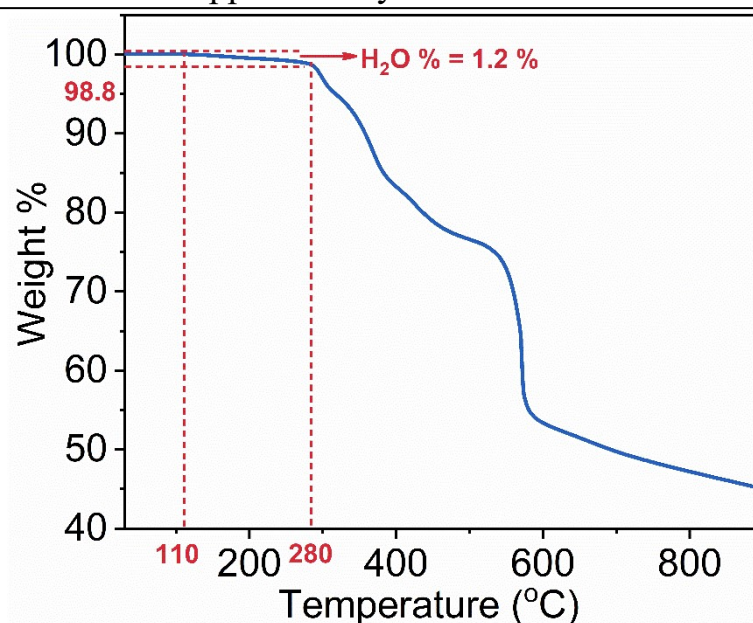

Fig. S3 TG curve for the as-synthesized sample of RCS-2.

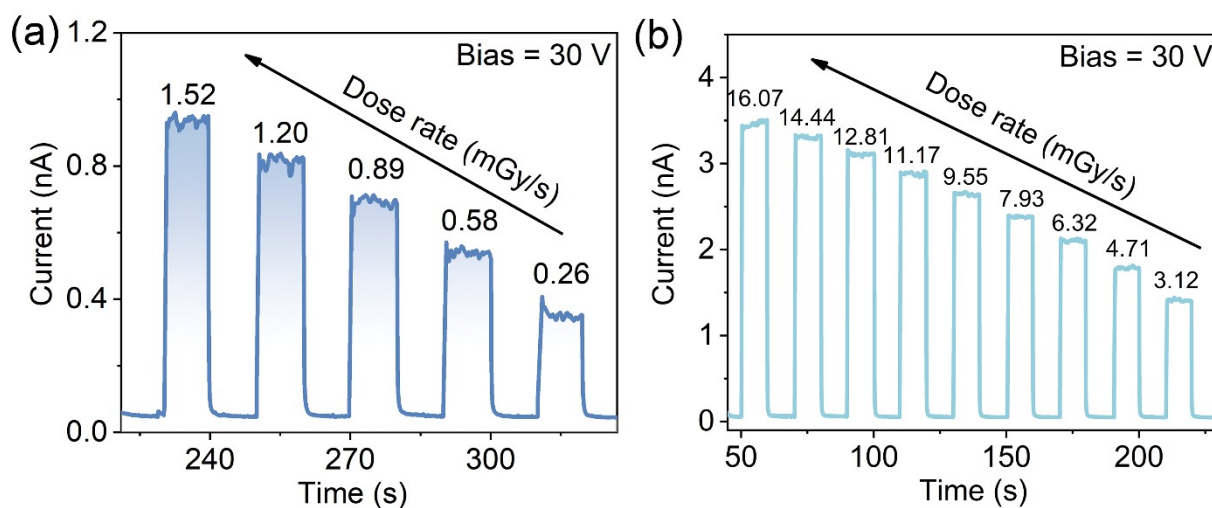

Fig. S4 The photocurrent of RCS-2 versus time under different X-ray dose rates from 0.26 mGy/s to 1.52 mGy/s (a) and 3.12 mGy/s to 16.07 mGy/s (b).

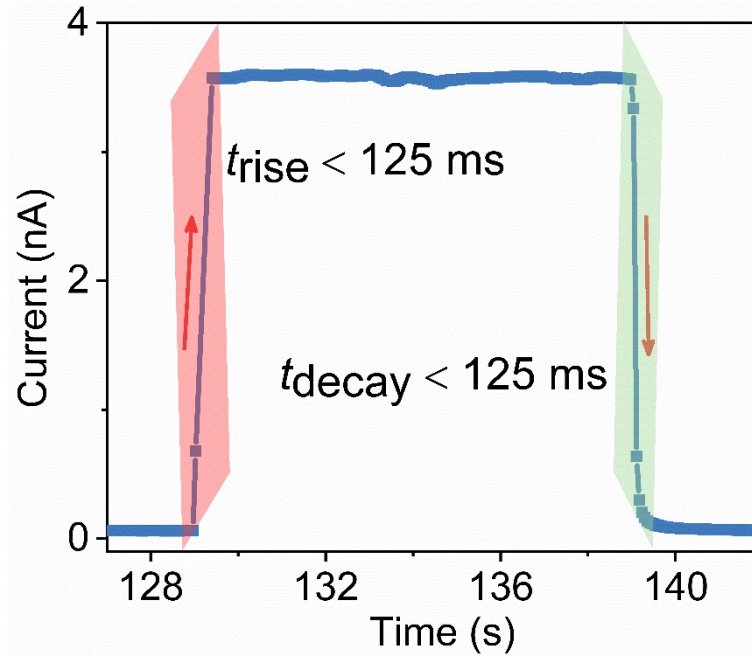

**Fig. S5** Temporal response of **RCS-2** with a bias voltage of 30 V.

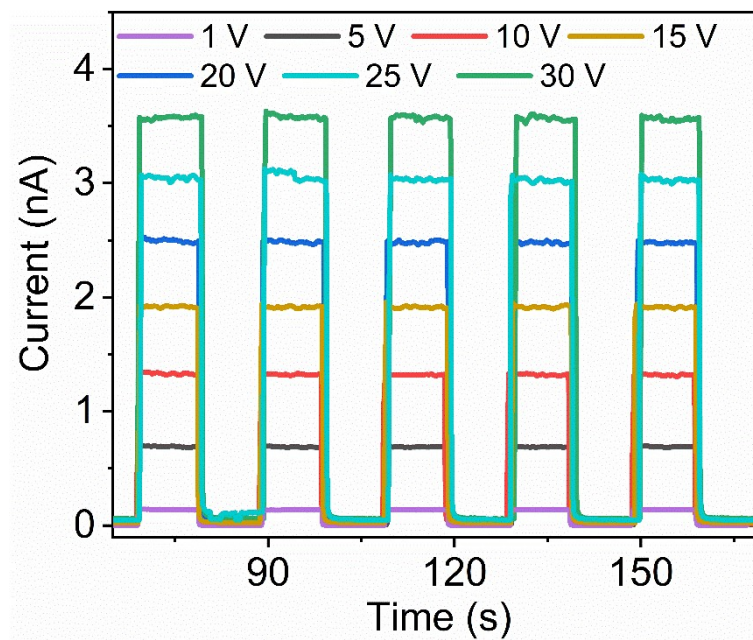

**Fig. S6** X-ray induced photocurrent response of the **RCS-2** detector under different bias voltage with the dose rate of  $16.07 \text{ mGy}_{\text{air}} \text{ s}^{-1}$ .



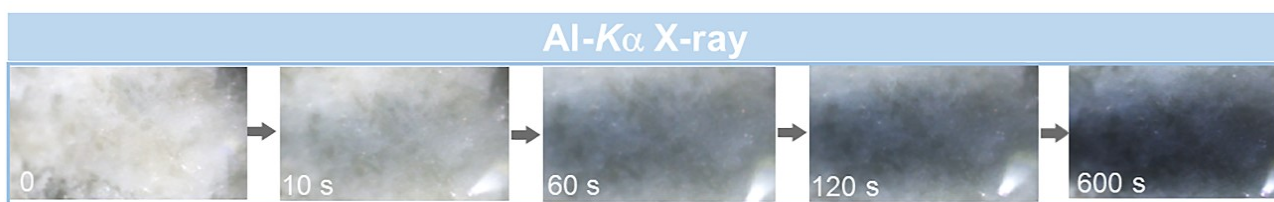

**Fig. S7** Time-dependent color changes of crystalline samples upon irradiation of Al-K $\alpha$  X-rays.

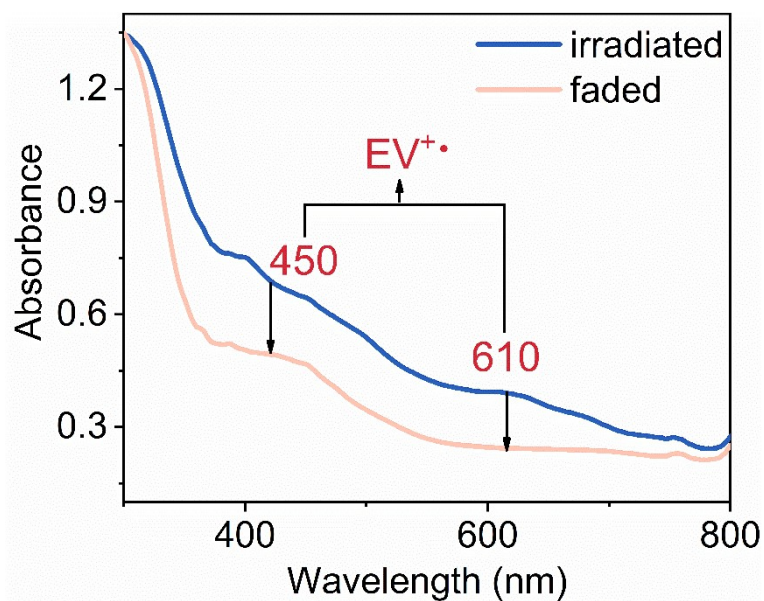

**Fig. S8** Electronic absorption spectra of after irradiated and naturally faded sample for **RCS-2**.

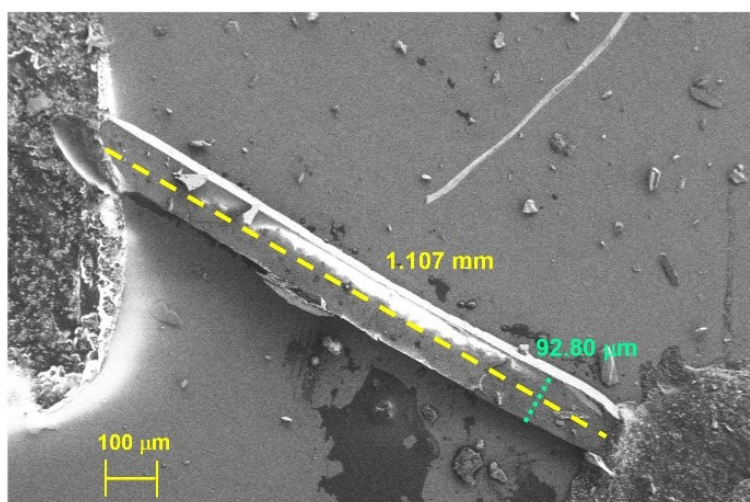

**Fig. S9** SEM image of single-crystal detector for **RCS-2**.

**Table S2.** Summary and comparison of the direct X-ray detection performances for MOF and  $\alpha$ -Se detectors.

| Materials                 | Sensitivity ( $S$ , $\mu\text{CGy}^{-1}\text{cm}^{-2}$ ) | Bias voltage (V) | Mobility-lifetime product ( $\mu\tau$ , $\text{cm}^2\text{V}^{-1}$ ) | Ref.             |
|---------------------------|----------------------------------------------------------|------------------|----------------------------------------------------------------------|------------------|
| <b>RCS-2 (SC.)</b>        | <b>6385</b>                                              | <b>30</b>        | <b><math>1.61 \times 10^{-4}</math></b>                              | <b>This work</b> |
| RCS-1                     | 98.58                                                    | 30               | $5.32 \times 10^{-4}$                                                | 2                |
| 1-SC-a (SC.)              | 2697                                                     | 30               | $3.44 \times 10^{-4}$                                                | 3                |
| MOF-2-film                | 137.31                                                   | 30               | $3.03 \times 10^{-3}$                                                | 4                |
| Ni-MOF-film               | 98.6                                                     | 10               | $3.26 \times 10^{-4}$                                                | 5                |
| EV-MOF (SC.)              | 3216                                                     | 30               | $8.27 \times 10^{-6}$                                                | 6                |
| SCU-12                    | 23.80                                                    | 30               | $1.30 \times 10^{-4}$                                                | 7                |
| SCU-13 (film)             | 65.86                                                    | 100              | $4.31 \times 10^{-4}$                                                | 8                |
| SCU-14                    | 54.93                                                    | 100              | $6.30 \times 10^{-4}$                                                | 9                |
| RhB <sup>+</sup> @TbTATAB | 51.90                                                    | 100              | $1.12 \times 10^{-3}$                                                | 10               |
| Cu-DABDT                  | 78.70                                                    | 1                | $6.49 \times 10^{-4}$                                                | 11               |
| $\alpha$ -Se              | 20                                                       | 5.50             | $10^{-7}$                                                            | 12               |

*Single-crystal (SC.)*

## References:

1. G.M. Sheldrick, Crystal structure refinement with SHELXL, *Acta Cryst.* **2015**, C71, 3–8.
2. Yu, X.; Mi, J.; Han, Y.; Sun, C.; Wang, M.; Guo, G., A stable radiochromic semiconductive viologen-based metal–organic framework for dual-mode direct X-ray detection. *Chin. Chem. Lett.* **2023**, 109233.
3. Li, B.-Y.; Xie, M.-J.; Lu, J.; Wang, W.-F.; Li, R.; Mi, J.-R.; Wang, S.-H.; Zheng, F.-K.; Guo, G.-C., Highly Sensitive Direct X-Ray Detector Based on Copper(II) Coordination Polymer Single Crystal with Anisotropic Charge Transport. *Small* **2023**, *19* (42). DOI:10.1002/sml.202302492.
4. Xie, M.-J.; Lu, J.; Li, B.-Y.; Wang, W.-F.; Wang, S.-H.; Zheng, F.-K.; Guo, G.-C., Barium(II)-based semiconductive coordination polymers for high-performance direct X-ray detection and imaging: Reducing the exciton binding energy via enhancing  $\pi$ - $\pi$  interactions. *Chem. Eng. J.* **2023**, 466, 143272.

5. Li, Z.; Chang, S.; Zhang, H.; Hu, Y.; Huang, Y.; Au, L.; Ren, S., Flexible Lead-Free X-ray Detector from Metal–Organic Frameworks. *Nano Lett.* **2021**, 21 (16), 6983-6989.
6. Han, Y.-F.; Xu, X.-M.; Wang, S.-H.; Wang, W.-F.; Wang, M.-S.; Guo, G.-C., Reusable radiochromic semiconductive MOF for dual-mode X-ray detection using color change and electric signal. *Chem. Eng. J.* **2022**, 437, 135468.
7. Wang, Y.; Liu, X.; Li, X.; Zhai, F.; Yan, S.; Liu, N.; Chai, Z.; Xu, Y.; Ouyang, X.; Wang, S., Direct Radiation Detection by a Semiconductive Metal–Organic Framework. *J. Am. Chem. Soc.* **2019**, 141 (20), 8030-8034.
8. Liang, C.; Zhang, S.; Cheng, L.; Xie, J.; Zhai, F.; He, Y.; Wang, Y.; Chai, Z.; Wang, S., Thermoplastic Membranes Incorporating Semiconductive Metal-Organic Frameworks: An Advance on Flexible X-ray Detectors. *Angew. Chem. Int. Ed.* **2020**, 59 (29), 11856-11860.
9. Cheng, L.; Liang, C.; Liu, W.; Wang, Y.; Chen, B.; Zhang, H.; Wang, Y.; Chai, Z.; Wang, S., Three-Dimensional Polycatenation of a Uranium-Based Metal-Organic Cage: Structural Complexity and Radiation Detection. *J. Am. Chem. Soc.* **2020**, 142 (38), 16218-16222.
10. Liang, C.; Cheng, L.; Zhang, S.; Yang, S.; Liu, W.; Xie, J.; Li, M. D.; Chai, Z.; Wang, Y.; Wang, S., Boosting the Optoelectronic Performance by Regulating Exciton Behaviors in a Porous Semiconductive Metal-Organic Framework. *J. Am. Chem. Soc.* **2022**, 144 (5), 2189-2196.
11. Li, Z.; Chang, S.; Zhang, H.; Hu, Y.; Huang, Y.; An, L.; Ren, S., Cu-based metal–organic frameworks for highly sensitive X-ray detectors. *Chem. Commun.* **2021**, 57 (69), 8612-8615.
12. Huang, H.; Abbaszadeh, S., Recent Developments of Amorphous Selenium-Based X-Ray Detectors: A Review. *IEEE Sens. J.* **2020**, 20 (4), 1694-1704.
